# Supplementary material for: Lack of Influence of Non-Overlapping Mutations in BRAF, NRAS, or NF1 on 12-Month Best Objective Response and Long-Term Survival after Checkpoint Inhibitor-Based Treatment for Metastatic Melanoma
Source: MDPI journal article supplement (doi:10.3390/cancers15133527), 2023-07-07
Supplement: s1 [file s1]

Table 2 Treatment characteristics and patient outcomes

| UPN | Mutation                                         | CKI Regimen | CKI doses | ORR     | PFS (mo) | TT added | OS (mo) | CKI toxicity                                          | Current status |
|-----|--------------------------------------------------|-------------|-----------|---------|----------|----------|---------|-------------------------------------------------------|----------------|
| 1   | BRAF F/R                                         | I/N         | 50        | PD      | 6.0      | D+T      | 57.3    | hypothyroidism                                        | DOD            |
| 2   | BRAF F/R                                         | I/N         | 12        | PD      | 4.1      | -        | 8.5     | colitis                                               | DOD            |
| 3   | BRAF F/R                                         | I/N         | 17        | PR      | 17.0     | D+T      | 19.9    | -                                                     | DOD            |
| 4   | BRAF F/R                                         | I/N         | 13        | PD      | 4.3      | D+T; E+B | 14.1    | immune nephritis                                      | DOD            |
| 5   | BRAF F/R                                         | P           | 8         | PD      | 20.5     | -        | 22.1    | hypothyroidism                                        | DOD            |
| 6   | BRAF V600E                                       | N           | 13        | CR      | 29.8     | E+B      | 29.8    | -                                                     | DOD            |
| 7   | BRAF V600E                                       | I/N         | 13        | CR (TT) | 44.1     | E        | 44.1    | Fever, diarrhea                                       | NED            |
| 8   | BRAF V600E                                       | N           | 8         | CR (TT) | 38.4     | D+T; E+B | 40.8    | skin rash                                             | NED            |
| 9   | BRAF V600E                                       | I/N         | 9         | PD      | 2.5      | E+B; E+T | 9.8     | -                                                     | DOD            |
| 10  | BRAF V600E                                       | I/N         | 16        | CR      | 29.1     | -        | 39.9    | -                                                     | NED            |
| 11  | BRAF V600E                                       | I/N         | 11        | PD      | 6.7      | E+B      | 17.4    | fevers                                                | DOD            |
| 12  | BRAF V600E                                       | N           | 12        | SD      | 27.9     | D+T      | 30.4    | hypothyroid                                           | NED            |
| 13  | BRAF V600E                                       | N           | 9         | CR      | 42.2     | -        | 42.5    | hand rash, hypothyroid                                | NED            |
| 14  | BRAF V600E                                       | I/N         | 10        | PD      | 8.5      | V; D     | 24.2    | colitis                                               | DOD            |
| 15  | BRAF V600E                                       | I/N         | 4         | CR      | 26.7     | -        | 26.7    | hypopituitarism                                       | NED            |
| 16  | BRAF V600E                                       | I/N         | 8         | CR      | 15.6     | -        | 15.6    | probable CIDP                                         | NED            |
| 17  | BRAF V600E                                       | I/N         | 3         | PD      | 2.0      | -        | 2.0     | -                                                     | DOD            |
| 18  | BRAF V600E                                       | I/N         | 8         | CR      | 19.3     | -        | 19.3    | rash, elevated LFTs, hypothyroid                      | NED            |
| 19  | BRAF V600E                                       | I/N         | 5         | PD      | 1.5      | E+B      | 21.6    | -                                                     | PD             |
| 20  | BRAF V600E                                       | I/N         | 4         | CR      | 18.5     | -        | 18.5    | encephalopathy, hypothyroid, rash                     | NED            |
| 21  | BRAF V600E                                       | I/N         | 2         | PR      | 9.8      | -        | 21.7    | colitis, pneumonitis                                  | NED            |
| 22  | BRAF V600K                                       | N           | 12        | CR      | 36.5     | -        | 36.5    | -                                                     | NED            |
| 23  | BRAF V600K                                       | I/N         | 7         | CR      | 41.5     | -        | 41.5    | hypopituitarism, skin rash                            | NED            |
| 24  | BRAF V600K                                       | I/N         | 16        | CR      | 41.3     | -        | 41.3    | hypopituitarism                                       | NED            |
| 25  | BRAF V600K                                       | I/N         | 32        | CR (TT) | 53.8     | D+T      | 53.8    | inflammatory arthritis; hypothyroid                   | NED            |
| 26  | BRAF V600K                                       | I/N         | 10        | CR      | 21.3     | -        | 21.3    | hypothyroid                                           | NED            |
| 27  | BRAF V600R                                       | N           | 7         | PD      | 7.1      | -        | 7.8     | pneumonitis                                           | PD             |
| 28  | NRAS Q61R                                        | I/N         | 24        | PD      | 14.5     | T; B     | 26.7    | colitis, arthritis                                    | DOD            |
| 29  | NRAS Q61K                                        | I/N         | 14        | PD      | 35.2     | -        | 35.2    | -                                                     | NED            |
| 30  | NRAS Q61K                                        | I/N         | 18        | PD      | 4.7      | T        | 29.5    | colitis                                               | DOD            |
| 31  | NRAS Q61K                                        | N           | 7         | CR      | 21.8     | -        | 23.4    | -                                                     | NED            |
| 32  | NRAS Q61K                                        | I/N         | 7         | PD      | 4.2      | B        | 18.6    | -                                                     | DOD            |
| 33  | NRAS Q61L                                        | I/N         | 11        | CR      | 45.4     | -        | 45.4    | colitis, hyperthyroidism                              | NED            |
| 34  | NRAS Q61L                                        | N           | 9         | CR      | 21.0     | -        | 21.0    | -                                                     | NED            |
| 35  | NRAS Q61R                                        | P           | 18        | PD      | 11.4     | T        | 27.4    | diarrhea, rash, hypopituitarism                       | DOD            |
| 36  | NRAS Q61R                                        | I/N         | 7         | PD      | 2.9      | -        | 8.5     | rash, hypophysitis, diarrhea                          | DOD            |
| 37  | NRAS Q61R                                        | I/N         | 2         | CR      | 24.9     | -        | 25.5    | rash, colitis, worsening RA                           | NED            |
| 38  | NRAS Q61R                                        | P           | 30        | PD      | 9.9      | T        | 23.6    | colitis                                               | DOD            |
| 39  | NRAS Q61R                                        | N           | 10        | CR      | 20.3     | -        | 20.3    | -                                                     | NED            |
| 40  | NRAS T50I, G12D                                  | N           | 3         | CR (TT) | 44.4     | T        | 44.4    | -                                                     | NED            |
| 41  | NF1 R1362                                        | I/N         | 4         | PD      | 3.2      | -        | 5.3     | colitis                                               | DOD            |
| 42  | NF1 E1734fs*4, R440*                             | N           | 3         | CR      | 47.7     | -        | 47.7    | -                                                     | NED            |
| 43  | NF1 Q1174*, E1790*                               | I/N         | 4         | PD      | 2.0      | -        | 2.7     | diarrhea, rash                                        | DOD            |
| 44  | NF1 E1206*, Q1806*                               | I/N         | 11        | CR      | 40.7     | -        | 40.7    | fevers                                                | NED            |
| 45  | NF1 R135W, L62*                                  | I/N         | 10        | CR      | 23.6     | -        | 23.6    | -                                                     | NED            |
| 46  | NF1 splice site 5296-1G>A, splice site 6819+1G>A | N           | 5         | CR      | 17.1     | -        | 17.1    | rash                                                  | NED            |
| 47  | NF1 B192*                                        | N           | 26        | CR      | 52.7     | -        | 52.7    | -                                                     | NED            |
| 48  | NF1 C1367*, T257fs*48                            | I/N         | 3         | PD      | 1.8      | T        | 2.7     | hypothyroid                                           | DOD            |
| 49  | NF1 E547*, R1276Q                                | N           | 12        | PD      | 2.3      | T; B     | 11.1    | -                                                     | DOD            |
| 50  | NF1 E725fs*3, Q948*                              | P           | 9         | CR      | 51.5     | -        | 51.5    | hypothyroidism                                        | NED            |
| 51  | NF1 G1758fs*6                                    | N           | 16        | CR (TT) | 35.4     | T        | 35.4    | -                                                     | NED            |
| 52  | NF1 K1704*                                       | N           | 10        | PR      | 8.3      | -        | 9.3     | -                                                     | DOD            |
| 53  | NF1 L1906fs*13                                   | N           | 12        | CR      | 49.6     | -        | 49.6    | colitis                                               | NED            |
| 54  | NF1 loss                                         | I/N         | 13        | PD      | 13.4     | T        | 50.3    | cutaneous granulomas; flank pain, flushing, dizziness | NED            |

|    |                                           |     |    |         |      |      |      |                                         |            |
|----|-------------------------------------------|-----|----|---------|------|------|------|-----------------------------------------|------------|
| 55 | NF1 loss                                  | I/N | 5  | PD      | 2.8  | T; C | 4.8  | rash                                    | DOD        |
| 56 | NF1 loss                                  | N   | 7  | PD      | 3.0  | -    | 23.1 | hypothyroid                             | DOD        |
| 57 | NF1 Q1055*                                | N   | 9  | SD      | 23.0 | T    | 23.0 | -                                       | SD         |
| 58 | NF1 Q1174*, R440*                         | I/N | 4  | CR      | 17.2 | -    | 17.2 | pruritis                                | NED        |
| 59 | NF1 Q1341*, R1362*, splice site 3113+1G>A | P   | 5  | PD      | 5.7  | -    | 7.9  | uveitis                                 | DOD        |
| 60 | NF1 R440*                                 | P   | 13 | CR      | 17.0 | -    | 46.5 | hypothyroid                             | NED        |
| 61 | NF1 S155fs*7                              | I/N | 4  | PD      | 1.4  | B    | 3.3  | -                                       | DOD        |
| 62 | NF1 S168*                                 | I/N | 19 | CR (TT) | 58.1 | T    | 58.1 | -                                       | NED        |
| 63 | NF1 truncation exon 10                    | I/N | 13 | PD      | 11.0 | -    | 16.0 | hypophysitis, elevated AST ALT, colitis | DOD        |
| 64 | NF1 Y489fs*1                              | I/N | 7  | PD      | 2.6  | -    | 54.4 | colitis, peripheral neuropathy          | NED        |
| 65 | TN                                        | I/N | 24 | PD      | 39.9 | T    | 39.9 | -                                       | DOD        |
| 66 | TN                                        | I/N | 6  | PD      | 7.4  | -    | 11.8 | colitis                                 | DOD        |
| 67 | TN                                        | I/N | 11 | CR      | 3.0  | -    | 29.1 | -                                       | NED        |
| 68 | TN                                        | I/N | 6  | CR      | 24.0 | -    | 24.0 | rash, arthritis                         | NED        |
| 69 | TN                                        | I/N | 13 | PD      | 1.8  | T; B | 11.2 | hypothyroidism                          | DOD        |
| 70 | TN                                        | I/N | 4  | SD      | 1.9  | -    | 2.3  | -                                       | Died-other |
| 71 | TN                                        | N   | 12 | CR      | 23.7 | -    | 23.7 | -                                       | NED        |
| 72 | TN                                        | P   | 42 | CR      | 63.9 | -    | 63.9 | -                                       | NED        |
| 73 | TN                                        | I/N | 10 | CR      | 21.8 | -    | 21.8 | rash, hypothyroidism                    | NED        |

UPN, unique patient number; BRAF F/R, BRAF gene fusion or rearrangement; TN, triple negative (no BRAF, NRAS or NF1 mutations detected); CKI, checkpoint inhibitor; I, ipilimumab; N, nivolumab, P, pembrolizumab; TT, targeted therapy; D, dabrafenib; T, trametinib; E, encorafenib; B, binimetinib; V, vemurafenib; C, cobimetinib; ORR, objective response rate; PFS, progression-free survival; OS, overall survival; OR, overall response; PD, progressive disease; CR, complete response; CR (TT), complete response due to addition of targeted therapy; SD, stable disease; PR, partial response; NED, no evidence of disease; DOD, died of disease; COD, cause of death
