# Supplementary material for: Lack of Influence of Non-Overlapping Mutations in BRAF, NRAS, or NF1 on 12-Month Best Objective Response and Long-Term Survival after Checkpoint Inhibitor-Based Treatment for Metastatic Melanoma
Source: MDPI journal article supplement (doi:10.3390/cancers15133527), 2023-07-07
Supplement: s1 [file s1]

**Table 1: Patient demographics**

| Pt | Mut                     | Age | Sex | Race | Primary site | Site of metastases                      | Initial Stage | Initial LDH | TMB (/Mb) | PDL1 (%) | Brain mets | KPS (%) | Comorbidities                                               |
|----|-------------------------|-----|-----|------|--------------|-----------------------------------------|---------------|-------------|-----------|----------|------------|---------|-------------------------------------------------------------|
| 1  | BRAF NF2 fusion         | 53  | F   | C    | trunk        | lung, SQ, adrenal, bone                 | IVC           | 115         | 6         |          | N          | 100     | HCL, obesity                                                |
| 2  | BRAF CCDC127 fusion     | 65  | M   | C    | trunk        | liver, spleen, bone, LN, lung           | IV            | 190         | n/a       |          | N          | 100     | HTN                                                         |
| 3  | BRAF rearr exon 8       | 68  | F   | C    | head         | LN, abdomen, bone                       | IIIC          | 190         | 5         | 80       | N          | 90      | N/A                                                         |
| 4  | BRAF T599_V600 insT     | 55  | M   | C    | leg          | LN, lung, bone, brain                   | IIID          | 172         | n/a       |          | Y          | 100     | BPH                                                         |
| 5  | BRAF del exon5-intron 7 | 66  | M   | C    | leg          | LN, bone, lung, liver                   | IV            | 162         | 5         | 1        | N          | 90      | back pain, HTN, renal cell carcinoma (in remission)         |
| 6  | BRAF V600E              | 34  | M   | C    | neck         | LN, SQ, liver, spleen, lung, brain      | IIIC          | 214         | 24        |          | Y          | 100     | GERD                                                        |
| 7  | BRAF V600E              | 26  | M   | C    | trunk        | adrenal, bone, axilla                   | III           | 161         | 5         |          | N          | 100     | N/A                                                         |
| 8  | BRAF V600E              | 51  | F   | C    | arm          | LN                                      | IIIC          | 161         | 10        |          | N          | 90      | N/A                                                         |
| 9  | BRAF V600E              | 53  | M   | C    | trunk        | LN, brain, bone                         | IV            | 286         | 8         |          | Y          | 80      | HTN, chronic back pain                                      |
| 10 | BRAF V600E              | 59  | M   | C    | trunk        | lung, bone                              | IIIB          | 248         | 3         | 0        | N          | 90      | arthritis, back pain, HCL, hypogonadism                     |
| 11 | BRAF V600E              | 43  | F   | C    | trunk        | lung, adrenal, brain, retroperitoneal   | IIIB          | 213         | 6         | 0        | Y          | 100     | back pain, anxiety, depression                              |
| 12 | BRAF V600E              | 48  | F   | C    | arm          | SQ                                      | IVA           | 175         | 3         |          | N          | 100     | back pain                                                   |
| 13 | BRAF V600E              | 51  | F   | C    | leg          | LN, lung                                | IVB           | 233         | Ind       |          | N          | 90      | back pain, depression                                       |
| 14 | BRAF V600E              | 59  | M   | C    | trunk        | LN, abdomen, axilla                     | IIIC          | 126         | n/a       |          | N          | 80      | N/A                                                         |
| 15 | BRAF V600E              | 48  | M   | C    | leg          | SQ                                      | IIIC          | 184         | 8         |          | N          | 100     | HTN                                                         |
| 16 | BRAF V600E              | 56  | M   | C    | trunk        | SQ, peripancreatic, bone, LN            | III           | 215         | 9         | 5        | N          | 90      | T2D, angina, HTN                                            |
| 17 | BRAF V600E              | 87  | M   | C    | unk          | SQ, liver, bone                         | IVA           | 359         | 14        | 100      | N          | 90      | T2D, aortic stenosis, CAD, HTN                              |
| 18 | BRAF V600E              | 66  | F   | C    | leg          | SQ                                      | IIIB          | 189         | 8         | 10       | N          | 100     | N/A                                                         |
| 19 | BRAF V600E              | 36  | M   | C    | head         | SQ, LN, parotid gland                   | IVB           | 165         | 1         | 10       | N          | 100     | N/A                                                         |
| 20 | BRAF V600E              | 63  | F   | C    | trunk        | stomach, colon, lung                    | IVB           | 172         | 11        | 1        | N          | 100     | N/A                                                         |
| 21 | BRAF V600E              | 35  | F   | C    | trunk        | breast                                  | IIB           | 178         | 14        | 0        | N          | 90      | N/a                                                         |
| 22 | BRAF V600E              | 75  | M   | C    | head         | SQ, LN                                  | IIIC          | 170         | 44        | 0        | N          | 90      | HTN, hyperlipidemia                                         |
| 23 | BRAF V600E              | 68  | M   | C    | trunk        | lung, muscle, LN                        | IVC           | 201         | 50        |          | N          | 100     | Afib, HTN                                                   |
| 24 | BRAF V600E              | 55  | M   | C    | head         | LN, SQ, lung                            | IVB           | 168         | 32        |          | N          | 80      | T2D, HTN, renal failure                                     |
| 25 | BRAF V600E              | 49  | M   | H    | head         | SQ, bone                                | IVA           | 158         | 25        |          | N          | 100     | N/A                                                         |
| 26 | BRAF V600E              | 52  | F   | C    | trunk        | LN, brain, lung                         | IIIC          | 160         | 19        | 1        | Y          | 90      | osteoporosis, HCL, bradycardia, anxiety, depression         |
| 27 | BRAF V600E              | 62  | F   | C    | arm          | LN, brain                               | IVD           | 276         | 11        | 1        | Y          | 80      | n/a                                                         |
| 28 | NRAS Q61R               | 51  | M   | C    | trunk        | LN, SQ, lung, bone                      | IIID          | 111         | 8         |          | N          | 90      | n/a                                                         |
| 29 | NRAS Q61K               | 49  | M   | C    | leg          | SQ, LN                                  | IIIC          | 191         | 57        | 1        | N          | 100     | HTN, BPH, hypotestosteronism                                |
| 30 | NRAS Q61K               | 32  | M   | C    | head         | LN, SQ, parotid, liver, brain           | IVD           | 167         | 13        |          | Y          | 90      | n/a                                                         |
| 31 | NRAS Q61K               | 79  | M   | C    | unk          | LN                                      | IVA           | 423         | 18        | 0        | N          | 90      | arthritis, chronic back pain, HTN                           |
| 32 | NRAS Q61K               | 69  | M   | C    | leg          | LN, SQ, liver, lungs                    | IIIB          | 180         | 4         | 1        | N          | 90      | SCC, CAD, T2D, HTN                                          |
| 33 | NRAS Q61L               | 57  | M   | C    | unk          | LN, chest wall                          | IVA           | 242         | 32        |          | N          | 90      | fatty liver, T2D, HTN                                       |
| 34 | NRAS Q61L               | 66  | M   | C    | arm          | SQ                                      | IVA           | 133         | 39        | 1        | N          | 100     | GERD, HCL                                                   |
| 35 | NRAS Q61R               | 48  | F   | C    | arm          | lung, LN, IM, SQ, bone, kidney, brain   | IVB           | 100         | n/a       |          | Y          | 100     | n/a                                                         |
| 36 | NRAS Q61R               | 63  | F   | C    | back         | LN, liver, retroperitoneum, lung, brain | IIIC          | 207         | 11        |          | Y          | 100     | GERD                                                        |
| 37 | NRAS Q61R               | 65  | M   | C    | trunk        | LN, colon                               | IVB           | 184         | 15        |          | N          | 90      | Depression, arthritis                                       |
| 38 | NRAS Q61R               | 67  | M   | C    | trunk        | LN                                      | IIIA          | 137         | 21        |          | N          | 80      | CAD, obesity, T2D, CHF                                      |
| 39 | NRAS Q61R               | 71  | M   | C    | arm          | LN, liver, spleen, lung                 | IIIB          | 141         | Ind       | 50       | N          | 80      | multiple sclerosis, CAD                                     |
| 40 | NRAS T50I, G12D         | 72  | M   | C    | trunk        | LN, liver, lung, bone                   | IIIB          | 223         | 81        |          | N          | 100     | HTN, CAD, HCL                                               |
| 41 | R1362                   | 59  | M   | C    | trunk        | lung, LN                                | IV            | 120         | n/a       |          | N          | 80      | n/a                                                         |
| 42 | NF1 E1734fs*4, R440*    | 100 | F   | C    | neck         | parotid, LN, pleura                     | IVB           | 220         | 34        |          | N          | 80      | afib, dementia, HTN                                         |
| 43 | NF1 Q1174*, E1790*      | 77  | M   | C    | head         | brain, lung                             | IVD           | 371         | 82        | 0        | Y          | 80      | T2D                                                         |
| 44 | NF1 E1206*, Q1806*      | 48  | M   | C    | head         | lung, LN                                | IIB           | 135         | 139       |          | N          | 100     | HCL, HTN                                                    |
| 45 | NF1 R135W, L62*         | 77  | M   | C    | unk          | pancreas, liver, bone, LN               | IVC           | 281         | 106       | 40       | N          | 90      | Hep B, HTN, GERD, anemia, thrombocytopenia, arrhythmia, CAD |

|    |                                                  |    |   |   |                 |                                        |      |     |     |    |   |     |                                                            |
|----|--------------------------------------------------|----|---|---|-----------------|----------------------------------------|------|-----|-----|----|---|-----|------------------------------------------------------------|
| 46 | NF1 splice site 5296-1G>A, splice site 6819+1G>A | 61 | M | C | head            | LN, SQ                                 | IIC  | 182 | 144 | 0  | N | 90  | n/a                                                        |
| 47 | NF1 B192*                                        | 75 | M | C | head            | lung, liver, LN, bone, brain           | IIB  | 146 | 47  | 0  | Y | 90  | arthritis, HTN, gout, T2D, hepatitis                       |
| 48 | NF1 C1367*, T257fs*48                            | 67 | M | C | trunk           | brain, liver, lung                     | IIA  | 312 | 79  | 60 | Y | 100 | n/a                                                        |
| 49 | NF1 E547*, R1276Q                                | 99 | M | C | head            | LN, SQ, lungs, bone                    | IIIB | 164 | 6   |    | N | 90  | arthritis, back pain, emphysema, HTN, CKD, CAD             |
| 50 | NF1 E725fs*3, Q948*                              | 75 | F | C | unk             | lung                                   | IVB  | 409 | 155 |    | N | 90  | HTN, HCL, CHF, Afib, COPD, anxiety                         |
| 51 | NF1 G1758fs*6                                    | 69 | M | C | arm             | LN, chest                              | IIA  | 200 | 54  |    | N | 100 | seizure disorder, HTN, hypothyroidism, T2D, HCL, arthritis |
| 52 | NF1 K1704*                                       | 72 | M | C | head            | SQ                                     | IIIC | 145 | 34  | 0  | N | 80  | T2D, HTN, gout                                             |
| 53 | NF1 L1906fs*13                                   | 71 | M | C | head            | LN                                     | IIIA | 166 | 73  |    | N | 100 | recurrent DVT, HTN                                         |
| 54 | NF1 loss                                         | 48 | M | C | head            | LN, liver, SQ, conjunctiva, lung       | unkn | 218 | 5   |    | N | 100 | HTN, GERD                                                  |
| 55 | NF1 loss                                         | 82 | M | C | face            | LN, bone, lung, sinus cavity           | IVB  | 135 | 6   |    | N | 90  | CAD, HTN                                                   |
| 56 | NF1 loss                                         | 53 | F | C | foot            | LN                                     | IIIB | 268 | 0   | 5  | N | 100 | Stage II colon cancer (in remission)                       |
| 57 | NF1 Q1055*                                       | 84 | M | C | scalp           | lung                                   | IIIB | 136 | 78  | 99 | N | 90  | DVT                                                        |
| 58 | NF1 Q1174*, R440*                                | 79 | M | C | scalp           | SQ, LN, lung                           | IIA  | 238 | 154 | 0  | N | 100 | HTN, hyperlipidemia                                        |
| 59 | NF1 Q1341*, R1362*, splice site 3113+1G>A        | 69 | M | C | unk             | brain, lung, intramuscular             | IVD  | 236 | n/a |    | Y | 70  | HTN                                                        |
| 60 | NF1 R440*                                        | 81 | M | C | trunk           | LN, lung, SQ                           | IV   | 166 | 52  |    | N | 80  | COPD, arthritis                                            |
| 61 | NF1 S155fs*7                                     | 77 | F | C | unk             | urethra, vagina                        | IVC  | 170 | 1   |    | N | 100 | back pain, HTN                                             |
| 62 | NF1 S168*                                        | 77 | M | C | face            | SQ, adrenal, lung, LN                  | unk  | 255 | 82  |    | N | 90  | CAD, arthritis, anxiety                                    |
| 63 | NF1 truncation exon 10                           | 62 | F | C | trunk           | bone                                   | IVC  | 170 | n/a |    | N | 90  | depression                                                 |
| 64 | NF-1 Y489fs*1                                    | 63 | M | C |                 | arm, lung, LN, bone                    | IVC  | 182 | 49  |    | N | 90  | Colitis, peripheral neuropathy                             |
| 65 | TN                                               | 56 | M | H | leg             | LN, colon, liver, bone, lung           | IIIB | 194 | 2   |    | N | 100 | HTN                                                        |
| 66 | TN                                               | 63 | M | C | scalp           | LN, chest, bone, thigh                 | unk  | 152 | 16  | 0  | N | 100 | n/a                                                        |
| 67 | TN                                               | 63 | M | C | trunk           | LN, SQ, mesentery, peritoneum, scrotum | IIC  | 133 | 4   | 0  | N | 100 | anxiety                                                    |
| 68 | TN                                               | 73 | F | C | leg             | LN, SQ, lung                           | IV   | 202 | 24  | 2  | N | 90  | n/a                                                        |
| 69 | TN                                               | 55 | M | C | leg             | LN, bone                               | IIIA | 197 | 11  | 0  | N | 100 | HTN, back pain, arthritis                                  |
| 70 | TN                                               | 60 | M | C | trunk           | lung                                   | IVB  | 202 | Ind |    | N | 90  | T2D, HTN, gout, HCL                                        |
| 71 | TN                                               | 73 | F | C | scalp           | cutaneous                              | III  | 210 | Ind |    | N | 100 | T2D, hypothyroidism, HCL, BCC                              |
| 72 | TN                                               | 42 | M | C | foot            | cutaneous, SQ, bone, IM, LN            | IVA  | 185 | 1   |    | N | 90  | obesity, depression, hypothyroidism                        |
| 73 | TN                                               | 70 | M | C | scalp and trunk | lung                                   | IIB  | 155 | 88  |    | N | 100 | multiple prior skin cancers, HCL, BPH                      |

UPN, unique patient number; TN, triple negative (no BRAF, NRAS or NF1 mutations identified); F, female; M, male; C, Caucasian; H, Hispanic; n/a, results not available; Y, yes; N, no; primary site; SQ, subcutaneous; LN, lymph node; ABD, abdomen; IM, intramuscular; unk, unknown; Ind, indeterminate; HCL, hypercholesterolemia; HTN, hypertension; T2D, Type 2 diabetes; CAD, coronary artery disease; BPH, benign prostatic hyperplasia; GERD, gastroesophageal reflux disease; COPD, chronic obstructive pulmonary disease; DVT, deep vein thrombosis; N/A, none.
